# Supplementary material
Source: ML conference proceedings conference paper supplement (https://openreview.net/forum?id=Zzi8Od19DSU)
Supplement: supplementary_material [file attachment]

---

# Supplementary Material: Posterior and Computational Uncertainty in Gaussian Processes

---

Jonathan Wenger<sup>1,2</sup>      Geoff Pleiss<sup>2</sup>

Marvin Pförtner<sup>1</sup>      Philipp Hennig<sup>1,3</sup>      John P. Cunningham<sup>2</sup>

<sup>1</sup> University of Tübingen

<sup>2</sup> Columbia University

<sup>3</sup> Max Planck Institute for Intelligent Systems, Tübingen

This supplementary material contains additional results and in particular proofs for all theoretical statements. References referring to sections, equations or theorem-type environments within this document are prefixed with ‘S’, while references to, or results from, the main paper are stated as is.

|                                                                         |           |
|-------------------------------------------------------------------------|-----------|
| <b>S1 Connections to Other GP Approximations</b>                        | <b>16</b> |
| S1.1 Pivoted Cholesky Decomposition . . . . .                           | 16        |
| S1.2 Singular / Eigenvalue Decomposition . . . . .                      | 17        |
| S1.3 Conjugate Gradient Method . . . . .                                | 18        |
| S1.4 Inducing Point Methods . . . . .                                   | 21        |
| <b>S2 Theoretical Results and Proofs</b>                                | <b>21</b> |
| S2.1 Properties of Algorithm 1 . . . . .                                | 21        |
| S2.2 Approximation of Representer Weights . . . . .                     | 25        |
| S2.3 Convergence Analysis of the Posterior Mean Approximation . . . . . | 26        |
| S2.4 Combined Uncertainty as Worst Case Error . . . . .                 | 27        |
| <b>S3 Implementation of Algorithm 1</b>                                 | <b>28</b> |
| S3.1 Policy Choice . . . . .                                            | 28        |
| S3.2 Stopping Criterion . . . . .                                       | 29        |
| S3.3 Efficient Sampling from the Combined Posterior . . . . .           | 29        |
| <b>S4 Additional Experimental Results</b>                               | <b>29</b> |

## S1 Connections to Other GP Approximations

### S1.1 Pivoted Cholesky Decomposition

**Theorem S3** (Pivoted Cholesky Decomposition)

Let  $(j_i)_{i=1}^n$  be a set of indices defining the pivot elements of the pivoted Cholesky decomposition and  $\mathbf{P} \in \mathbb{R}^{n \times n}$  the corresponding permutation matrix. Assume the actions of Algorithm 1 are given by the standard unit vectors  $\mathbf{s}_i = \mathbf{P}\mathbf{e}_i = \mathbf{e}_{j_i}$ , i.e.

$$(\mathbf{s}_i)_j = (\mathbf{e}_{j_i})_j = \begin{cases} 1 & \text{if } j = j_i \\ 0 & \text{otherwise} \end{cases} . \quad (\text{S17})$$

Then Algorithm 1 recovers the pivoted Cholesky decomposition, i.e. it holds for all  $i \in \{0, \dots, n\}$  that

$$\mathbf{P}^\top \mathbf{Q}_i \mathbf{P} = \mathbf{L}_i \mathbf{L}_i^\top, \quad (\text{S18})$$

where  $\mathbf{L}_i \in \mathbb{R}^{n \times i}$  is the (partial) Cholesky factor of  $\mathbf{P}^\top \hat{\mathbf{K}} \mathbf{P}$  as computed by Algorithm S2.

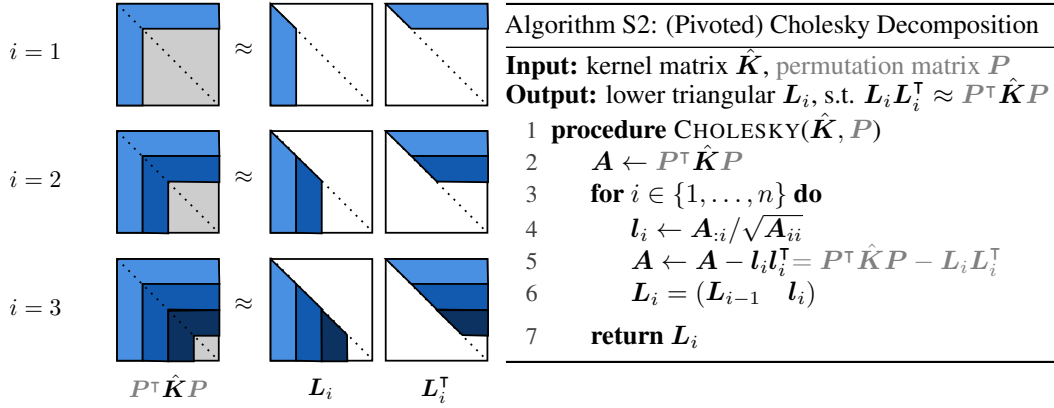

Figure S1: *Cholesky decomposition*. Every column added to the lower triangular Cholesky factor  $L$  defines the  $i$ th “right angle ruler”-pattern in  $P^\top \hat{K} P$ . The bottom right matrix in gray given by  $P^\top \hat{K} P - L_i L_i^\top = P^\top \hat{K} P - \sum_{j=1}^i l_j l_j^\top$  changes every iteration.

*Proof.* We proceed by induction. Assume (S18) holds after  $i$  iterations of Algorithm 1. For the base case  $i = 0$ , it holds by assumption that  $P^\top Q_0 P = P^\top \hat{K} C_0 \hat{K} P = 0$ . Now for the induction step  $i \rightarrow i + 1$ , we have

$$\begin{aligned}
\frac{1}{\eta_{i+1}} \hat{K} d_i d_i^\top \hat{K} &= \frac{1}{\eta_{i+1}} \hat{K} \Sigma_i \hat{K} s_{i+1} s_{i+1}^\top \hat{K} \Sigma_i \hat{K} \\
&= \frac{1}{\eta_{i+1}} \hat{K} (\Sigma_0 - C_i) \hat{K} s_{i+1} s_{i+1}^\top \hat{K} (\Sigma_0 - C_i) \hat{K} \\
&= \frac{1}{\eta_{i+1}} (\hat{K} - Q_i) s_{i+1} s_{i+1}^\top (\hat{K} - Q_i) \\
&\stackrel{\text{IH}}{=} \frac{1}{\eta_{i+1}} (\hat{K} - P L_i L_i^\top P^\top) s_{i+1} s_{i+1}^\top (\hat{K} - P L_i L_i^\top P^\top) \\
&= \frac{(\hat{K} - P L_i L_i^\top P^\top) P e_{i+1}}{\sqrt{e_{i+1}^\top P^\top (\hat{K} - P L_i L_i^\top P^\top) P e_{i+1}}} \frac{e_{i+1}^\top P^\top (\hat{K} - P L_i L_i^\top P^\top)}{\sqrt{e_{i+1}^\top P^\top (\hat{K} - P L_i L_i^\top P^\top) P e_{i+1}}} \\
&= \frac{P (P^\top \hat{K} P - L_i L_i^\top) e_{i+1}}{\sqrt{e_{i+1}^\top (P^\top \hat{K} P - L_i L_i^\top) e_{i+1}}} \frac{e_{i+1}^\top (P^\top \hat{K} P - L_i L_i^\top) P^\top}{\sqrt{e_{i+1}^\top (P^\top \hat{K} P - L_i L_i^\top) e_{i+1}}} \\
&= P l_{i+1} l_{i+1}^\top P^\top.
\end{aligned}$$

where  $l_{i+1}$  is given by Algorithm S2. Combining this with one more use of the induction hypothesis we obtain

$$\begin{aligned}
P^\top Q_{i+1} P &= P^\top Q_i P + \frac{1}{\eta_{i+1}} P^\top \hat{K} d_{i+1} d_{i+1}^\top \hat{K} P \\
&= L_i L_i^\top + l_{i+1} l_{i+1}^\top = (L_i \quad l_{i+1}) \begin{pmatrix} L_i^\top \\ l_{i+1}^\top \end{pmatrix} = L_{i+1} L_{i+1}^\top
\end{aligned}$$

This proves the claim. □

## S1.2 Singular / Eigenvalue Decomposition

**Theorem S4** (Singular / Eigenvalue Decomposition)

Let the actions  $s_i = \mathbf{u}_i$  of Algorithm 1 be given by the eigenvectors  $\mathbf{u}_i$  of  $\hat{K}$  in arbitrary order. Then

for  $i \in \{1, \dots, n\}$  it holds that

$$\begin{aligned} C_i &= U_i \Lambda_i^{-1} U_i^\top = \text{SVD}_i(\hat{K}^{-1}) \\ Q_i &= U_i \Lambda_i U_i^\top = \text{SVD}_i(\hat{K}), \end{aligned}$$

where  $U = (\mathbf{u}_1, \dots, \mathbf{u}_i) \in \mathbb{R}^{n \times i}$  and  $\Lambda = \text{diag}(\lambda_1, \dots, \lambda_i) \in \mathbb{R}^{i \times i}$  is the diagonal matrix of eigenvalues of  $\hat{K}$  with the order given by the order of the actions.

*Proof.* It holds by assumption and eq. (S37), that

$$C_i = S_i (S_i^\top \hat{K} S_i)^{-1} S_i^\top = U_i (U_i^\top \hat{K} U_i)^{-1} U_i^\top = U_i \Lambda_i^{-1} U_i^\top,$$

as well as

$$Q_i = \hat{K} C_i \hat{K} = \hat{K} U_i \Lambda_i^{-1} U_i^\top \hat{K} = U_i \Lambda_i \Lambda_i^{-1} \Lambda_i U_i^\top = U_i \Lambda_i U_i^\top$$

This proves the claim.  $\square$

### S1.3 Conjugate Gradient Method

---

Algorithm S3: Preconditioned Conjugate Gradient Method [38]

---

**Input:** kernel matrix  $\hat{K}$ , labels  $\mathbf{y}$ , prior mean  $\boldsymbol{\mu}$ , preconditioner  $\hat{P}$

**Output:** representer weights  $\mathbf{v}_i \approx \hat{K}^{-1}(\mathbf{y} - \boldsymbol{\mu})$

```

1 procedure CG( $\hat{K}, \mathbf{y} - \boldsymbol{\mu}, \hat{P}$ )
2    $\mathbf{v}_0 \leftarrow \mathbf{0}$ 
3    $\mathbf{s}_0 \leftarrow \mathbf{0}$ 
4   while  $\|\mathbf{r}_i\|_2 > \max(\delta_{\text{rtol}} \|\mathbf{y}\|_2, \delta_{\text{atol}})$  and  $i < i_{\text{max}}$  do
5      $\mathbf{r}_{i-1} \leftarrow (\mathbf{y} - \boldsymbol{\mu}) - \hat{K} \mathbf{v}_{i-1}$ 
6      $\mathbf{s}_i \leftarrow \hat{P}^{-1} \mathbf{r}_{i-1} - \frac{(\hat{P}^{-1} \mathbf{r}_{i-1})^\top \hat{K} \mathbf{s}_{i-1}}{\mathbf{s}_{i-1}^\top \hat{K} \mathbf{s}_{i-1}} \mathbf{s}_{i-1}$ 
7      $\mathbf{v}_i \leftarrow \mathbf{v}_{i-1} + \frac{(\hat{P}^{-1} \mathbf{r}_{i-1})^\top \mathbf{r}_{i-1}}{\mathbf{s}_i^\top \hat{K} \mathbf{s}_i} \mathbf{s}_i$ 
8   return  $\mathbf{v}$ 

```

---

**Theorem S5** (Preconditioned Conjugate Gradient Method)

Let  $\hat{P} \in \mathbb{R}^{n \times n}$  be a symmetric positive definite preconditioner. Assume the actions of Algorithm 1 are given by

$$\begin{aligned} \mathbf{s}_1^{\text{CG}} &= \hat{P}^{-1} \mathbf{r}_0 \\ \mathbf{s}_i^{\text{CG}} &= \hat{P}^{-1} \mathbf{r}_{i-1} - \frac{(\hat{P}^{-1} \mathbf{r}_{i-1})^\top \hat{K} \mathbf{s}_{i-1}}{\mathbf{s}_{i-1}^\top \hat{K} \mathbf{s}_{i-1}} \mathbf{s}_{i-1} \end{aligned} \quad (\text{S19})$$

the preconditioned conjugate gradient method. Then Algorithm 1 recovers preconditioned CG initialized at  $\mathbf{v}_0^{\text{CG}} = \mathbf{0}$ , i.e. it holds for  $i \in \{1, \dots, n\}$  that

$$\mathbf{s}_i = \mathbf{d}_i = \mathbf{s}_i^{\text{CG}} \quad (\text{S20})$$

$$\mathbf{v}_i = \mathbf{v}_i^{\text{CG}} \quad (\text{S21})$$

$$\mathbf{r}_{i-1} = \mathbf{r}_{i-1}^{\text{CG}}. \quad (\text{S22})$$

*Proof.* First note that by assumption  $\mathbf{s}_i = \mathbf{s}_i^{\text{CG}}$  for all  $i$ . We prove the remaining claims by induction. For the base case we have by assumption  $\mathbf{d}_0 = \boldsymbol{\Sigma}_0 \hat{K} \mathbf{s}_0 = \mathbf{s}_0 = \mathbf{s}_0^{\text{CG}}$  and  $\mathbf{v}_0 = \mathbf{0} = \mathbf{v}_0^{\text{CG}}$ . Now for the induction step  $i \rightarrow i+1$  assume the hypotheses (S20), (S21) and (S22) hold  $\forall j \leq i$ . Using the properties of CG it holds for  $j' < i$  that

$$\mathbf{s}_i^\top \hat{K} \mathbf{s}_{j'} = 0 \quad (\text{S23})$$

$$(\hat{P}^{-1} \mathbf{r}_i)^\top \mathbf{s}_{j'} = 0 \quad (\text{S24})$$

$$(\hat{P}^{-1} \mathbf{r}_i)^\top \mathbf{r}_{j'} = 0 \quad (\text{S25})$$

$$\langle \mathbf{s}_1, \dots, \mathbf{s}_i \rangle = \langle \mathbf{r}_0, \hat{P}^{-1} \hat{K} \mathbf{r}_0, \dots, (\hat{P}^{-1} \hat{K})^{i-1} \mathbf{r}_0 \rangle = \langle \hat{P}^{-1} \mathbf{r}_0, \dots, \hat{P}^{-1} \mathbf{r}_{i-1} \rangle \quad (\text{S26})$$

We now first show  $\hat{\mathbf{K}}$ -conjugacy of the actions in iteration  $i + 1$ . We have for  $j \leq i$  that

$$\begin{aligned} \mathbf{s}_{i+1}^\top \hat{\mathbf{K}} \mathbf{s}_j &= \left( \hat{\mathbf{P}}^{-1} \mathbf{r}_i - \frac{(\hat{\mathbf{P}}^{-1} \mathbf{r}_i)^\top \hat{\mathbf{K}} \mathbf{s}_i}{\mathbf{s}_i^\top \hat{\mathbf{K}} \mathbf{s}_i} \mathbf{s}_i \right)^\top \hat{\mathbf{K}} \mathbf{s}_j \\ &= (\hat{\mathbf{P}}^{-1} \mathbf{r}_i)^\top \hat{\mathbf{K}} \mathbf{s}_j - \frac{(\hat{\mathbf{P}}^{-1} \mathbf{r}_i)^\top \hat{\mathbf{K}} \mathbf{s}_i}{\mathbf{s}_i^\top \hat{\mathbf{K}} \mathbf{s}_i} \mathbf{s}_i^\top \hat{\mathbf{K}} \mathbf{s}_j \end{aligned}$$

Now if  $j = i$ , clearly  $\mathbf{s}_{i+1}^\top \hat{\mathbf{K}} \mathbf{s}_j = \mathbf{s}_{i+1}^\top \hat{\mathbf{K}} \mathbf{s}_i = 0$ . If  $j < i$ , we have using (S26), that

$$\hat{\mathbf{P}}^{-1} \hat{\mathbf{K}} \mathbf{s}_j \in \langle \hat{\mathbf{P}}^{-1} \hat{\mathbf{K}} \mathbf{r}_0, \dots, (\hat{\mathbf{P}}^{-1} \hat{\mathbf{K}})^j \mathbf{r}_0 \rangle \subset \langle \hat{\mathbf{P}}^{-1} \mathbf{r}_0, \dots, \hat{\mathbf{P}}^{-1} \mathbf{r}_j \rangle. \quad (\text{S27})$$

Therefore we obtain for  $j < i$ , that

$$\mathbf{s}_{i+1}^\top \hat{\mathbf{K}} \mathbf{s}_j \stackrel{(\text{S23})}{=} \mathbf{r}_i^\top \hat{\mathbf{P}}^{-1} \hat{\mathbf{K}} \mathbf{s}_j \stackrel{(\text{S27})}{=} \mathbf{r}_i^\top \left( \sum_{\ell=1}^j \gamma_\ell \hat{\mathbf{P}}^{-1} \mathbf{r}_\ell \right) \stackrel{(\text{S25})}{=} 0. \quad (\text{S28})$$

Thus in combination we have

$$\forall j \in \{1, \dots, i\} : \quad \mathbf{s}_{i+1}^\top \hat{\mathbf{K}} \mathbf{s}_j = 0. \quad (\text{S29})$$

Now for the search direction we have

$$\begin{aligned} \mathbf{d}_{i+1} &= \Sigma_i \hat{\mathbf{K}} \mathbf{s}_{i+1} = \left( \Sigma_0 - \sum_{j=1}^i \frac{\mathbf{d}_j \mathbf{d}_j^\top}{\eta_j} \right) \hat{\mathbf{K}} \mathbf{s}_{i+1} \\ &= \mathbf{s}_{i+1} - \sum_{j=1}^i \frac{\mathbf{d}_j^\top \hat{\mathbf{K}} \mathbf{s}_{i+1}}{\eta_j} \mathbf{d}_j \stackrel{(\text{S20})}{=} \mathbf{s}_{i+1} - \sum_{j=1}^i \frac{\mathbf{s}_j^\top \hat{\mathbf{K}} \mathbf{s}_{i+1}}{\eta_j} \mathbf{d}_j \\ &\stackrel{(\text{S29})}{=} \mathbf{s}_{i+1}. \end{aligned} \quad (\text{S30})$$

Further, we have for the solution estimate, that  $\mathbf{v}_{i+1} = \mathbf{v}_i + \mathbf{d}_{i+1} \frac{\alpha_{i+1}}{\eta_{i+1}}$ . It holds that

$$\begin{aligned} \alpha_{i+1} &= \mathbf{s}_{i+1}^\top \mathbf{r}_i = \left( \hat{\mathbf{P}}^{-1} \mathbf{r}_i - \frac{(\hat{\mathbf{P}}^{-1} \mathbf{r}_i)^\top \hat{\mathbf{K}} \mathbf{s}_i}{\mathbf{s}_i^\top \hat{\mathbf{K}} \mathbf{s}_i} \mathbf{s}_i \right)^\top \mathbf{r}_i \\ &= (\hat{\mathbf{P}}^{-1} \mathbf{r}_i)^\top \mathbf{r}_i - \sum_{j=0}^i c_j (\hat{\mathbf{P}}^{-1} \mathbf{r}_{j-1})^\top \mathbf{r}_i \stackrel{(\text{S25})}{=} (\hat{\mathbf{P}}^{-1} \mathbf{r}_i)^\top \mathbf{r}_i \end{aligned}$$

as well as

$$\eta_{i+1} = \mathbf{s}_{i+1}^\top \hat{\mathbf{K}} \Sigma_i \hat{\mathbf{K}} \mathbf{s}_{i+1} = \mathbf{d}_{i+1}^\top \hat{\mathbf{K}} \mathbf{s}_{i+1} \stackrel{(\text{S30})}{=} \mathbf{s}_{i+1}^\top \hat{\mathbf{K}} \mathbf{s}_{i+1}$$

Combining the above and recalling Algorithm S3, we obtain

$$\mathbf{v}_{i+1} = \mathbf{v}_i + \mathbf{d}_{i+1} \frac{\alpha_{i+1}}{\eta_{i+1}} = \mathbf{v}_i + \mathbf{d}_{i+1} \frac{(\hat{\mathbf{P}}^{-1} \mathbf{r}_i)^\top \mathbf{r}_i}{\mathbf{s}_{i+1}^\top \hat{\mathbf{K}} \mathbf{s}_{i+1}} = \mathbf{v}_{i+1}^{\text{CG}}.$$

Finally, the residual is computed identically in Algorithm 1 as in Algorithm S3, giving

$$\mathbf{r}_i = (\mathbf{y} - \boldsymbol{\mu}) - \hat{\mathbf{K}} \mathbf{v}_i = (\mathbf{y} - \boldsymbol{\mu}) - \hat{\mathbf{K}} \mathbf{v}_i^{\text{CG}} = \mathbf{r}_i^{\text{CG}}.$$

This proves the claims.  $\square$

**Corollary S2** (Preconditioned Gradient Actions as CG Actions)

*Choosing actions*

$$\mathbf{s}_i = \hat{\mathbf{P}}^{-1} \mathbf{r}_{i-1} \quad (\text{S31})$$

*in Theorem S5 instead also reproduces the preconditioned conjugate gradient method, i.e. it holds for  $i \in \{1, \dots, n\}$  that*

$$\mathbf{d}_i = \mathbf{s}_i^{\text{CG}} \quad (\text{S32})$$

$$\mathbf{v}_i = \mathbf{v}_i^{\text{CG}} \quad (\text{S33})$$

$$\mathbf{r}_{i-1} = \mathbf{r}_{i-1}^{\text{CG}}. \quad (\text{S34})$$

*Proof.* It suffices to show that  $\mathbf{d}_i = \mathbf{s}_i^{\text{CG}}$ . The rest of the argument is then identical to the proof of Theorem S5. We prove the claim by induction. For the base case by assumption  $\mathbf{s}_1 = \hat{\mathbf{P}}^{-1}\mathbf{r}_0 = \mathbf{s}_1^{\text{CG}}$ . Now for the induction step  $i \rightarrow i+1$ , assume that  $\mathbf{d}_j = \mathbf{s}_j$  for all  $j \leq i$ , then

$$\begin{aligned} \mathbf{d}_{i+1} &= \Sigma_i \hat{\mathbf{K}} \hat{\mathbf{P}}^{-1} \mathbf{r}_i \\ &= (\mathbf{I} - \mathbf{C}_i \hat{\mathbf{K}}) \hat{\mathbf{P}}^{-1} \mathbf{r}_i \\ &= \hat{\mathbf{P}}^{-1} \mathbf{r}_i - \mathbf{D}_i (\mathbf{D}_i^\top \hat{\mathbf{K}} \mathbf{D}_i)^{-1} \mathbf{D}_i^\top \hat{\mathbf{K}} \hat{\mathbf{P}}^{-1} \mathbf{r}_i && \text{By eq. (S37).} \\ &\stackrel{\text{IH}}{=} \hat{\mathbf{P}}^{-1} \mathbf{r}_i - \mathbf{S}_i^{\text{CG}} ((\mathbf{S}_i^{\text{CG}})^\top \hat{\mathbf{K}} \mathbf{S}_i^{\text{CG}})^{-1} (\mathbf{S}_i^{\text{CG}})^\top \hat{\mathbf{K}} \hat{\mathbf{P}}^{-1} \mathbf{r}_i \end{aligned}$$

Now by the same argument as in eq. (S28) in the proof of Theorem S5 we have for all  $j < i$  that  $\mathbf{r}_i^\top \hat{\mathbf{P}}^{-1} \hat{\mathbf{K}} \mathbf{s}_j^{\text{CG}} = 0$ . Therefore

$$\begin{aligned} &= \hat{\mathbf{P}}^{-1} \mathbf{r}_i - \mathbf{s}_i^{\text{CG}} ((\mathbf{s}_i^{\text{CG}})^\top \hat{\mathbf{K}} \mathbf{s}_i^{\text{CG}})^{-1} (\mathbf{s}_i^{\text{CG}})^\top \hat{\mathbf{K}} \hat{\mathbf{P}}^{-1} \mathbf{r}_i \\ &= \mathbf{s}_{i+1}^{\text{CG}} && \text{By eq. (S19).} \end{aligned}$$

This proves the claim.  $\square$

**Corollary S3** (Deflated Conjugate Gradient Method)

Let the first  $0 < \ell < n$  actions  $(\mathbf{s}_i)_{i=1}^\ell$  of Algorithm 1 be linearly independent and the remaining ones be given by  $\mathbf{s}_i = \hat{\mathbf{P}}^{-1} \mathbf{r}_i$ , where  $\hat{\mathbf{P}} \approx \hat{\mathbf{K}}$  is a preconditioner. Then Algorithm 1 is equivalent to the preconditioned deflated CG algorithm [63, Alg. 3.6] with deflation subspace  $\text{span}\{\mathbf{S}_\ell\}$ .

*Proof.* By the form of preconditioned deflated CG given in Algorithm 3.6 of Saad et al. [63] and Corollary S2, it suffices to show that the residual  $\mathbf{r}_\ell$  satisfies  $\mathbf{S}_\ell^\top \mathbf{r}_\ell = \mathbf{0}$  and that for all  $i > \ell$ , it holds that

$$\mathbf{s}_i^{\text{defCG}} = \mathbf{d}_i = (\mathbf{I} - \mathbf{C}_{i-1} \hat{\mathbf{K}}) \mathbf{s}_i.$$

Now it holds by Lemma S2 and eq. (S37), that

$$\mathbf{S}_\ell^\top \mathbf{r}_\ell = \mathbf{S}_\ell^\top (\mathbf{I} - \hat{\mathbf{K}} \mathbf{C}_\ell) (\mathbf{y} - \boldsymbol{\mu}) = \underbrace{\mathbf{S}_\ell^\top (\mathbf{I} - \hat{\mathbf{K}} \mathbf{S}_\ell (\mathbf{S}_\ell^\top \hat{\mathbf{K}} \mathbf{S}_\ell)^{-1} \mathbf{S}_\ell^\top)}_{=\mathbf{0}} (\mathbf{y} - \boldsymbol{\mu}) = \mathbf{0}.$$

This proves the first claim. Now, by Saad et al. [63, Alg. 3.6], the search directions  $(\mathbf{s}_i^{\text{defCG}})_{i=\ell+1}^n$  of preconditioned deflated CG are given by

$$\begin{aligned} \mathbf{s}_i^{\text{defCG}} &= \mathbf{s}_i^{\text{CG}} - \mathbf{S}_\ell (\mathbf{S}_\ell^\top \hat{\mathbf{K}} \mathbf{S}_\ell)^{-1} \mathbf{S}_\ell^\top \hat{\mathbf{K}} \hat{\mathbf{P}}^{-1} \mathbf{r}_i \\ &= (\mathbf{I} - \mathbf{C}_{\ell+1:(i-1)} \hat{\mathbf{K}}) \mathbf{s}_i - \mathbf{S}_\ell (\mathbf{S}_\ell^\top \hat{\mathbf{K}} \mathbf{S}_\ell)^{-1} \mathbf{S}_\ell^\top \hat{\mathbf{K}} \hat{\mathbf{P}}^{-1} \mathbf{r}_i && \text{Corollary S2} \\ &= (\mathbf{I} - \mathbf{C}_{\ell+1:(i-1)} \hat{\mathbf{K}}) \mathbf{s}_i - \mathbf{C}_\ell \hat{\mathbf{K}} \mathbf{s}_i \\ &= (\mathbf{I} - (\mathbf{C}_{\ell+1:(i-1)} - \mathbf{C}_\ell) \hat{\mathbf{K}}) \mathbf{s}_i \\ &= (\mathbf{I} - \mathbf{C}_{i-1} \hat{\mathbf{K}}) \mathbf{s}_i \\ &= \mathbf{d}_i \end{aligned}$$

This proves the claim.  $\square$

**Remark S1** (Preconditioning and Algorithm 1)

Iterative methods typically have convergence rates depending on the condition number of the system matrix. One successful strategy in practice to accelerate convergence is to use a preconditioner  $\hat{\mathbf{P}} \approx \hat{\mathbf{K}}$  [64]. A preconditioner needs to be cheap to compute and allow efficient matrix-vector multiplication  $\mathbf{v} \mapsto \hat{\mathbf{P}}^{-1} \mathbf{v}$ . Now, Algorithm 1 implicitly constructs and applies a *deflation-based preconditioner*, which are defined via a deflation subspace to be projected out [65]. In Algorithm 1 this is precisely the already explored space  $\text{span}\{\mathbf{S}_i\} = \text{span}\{\mathbf{D}_i\}$  spanned by the actions. Therefore, if we run a mixed strategy, meaning first choosing actions that define a certain subspace and then choose residual actions, we recover the *deflated conjugate gradient method* [63] (see Corollary S3 for a proof). Alternatively, one can also use byproducts of the iteration of Algorithm 1 to construct a diagonal-plus-low-rank preconditioner of the form  $\hat{\mathbf{P}} = \sigma^2 \mathbf{I} + \mathbf{U} \mathbf{U}^\top \approx \hat{\mathbf{K}}$  where  $\mathbf{U} = \mathbf{K} \mathbf{D}_i \text{diag}(\eta_1, \dots, \eta_i) \in \mathbb{R}^{n \times i}$ . Therefore, again if running a mixed strategy, one can first construct a preconditioner and then accelerate the convergence of subsequent CG iterations. In this sense one can double-dip in terms of preconditioning (conjugate) gradient iterations by combining these two techniques *at essentially no overhead*.

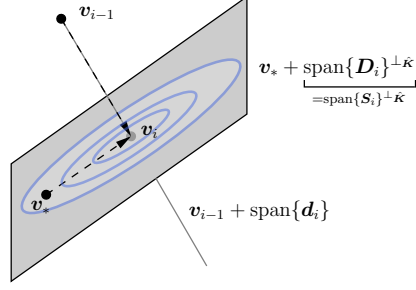

Figure S2: Geometric perspective on the probabilistic linear solver learning representer weights  $\mathbf{v}_*$ .

## S1.4 Inducing Point Methods

**Theorem S6** (Approximate Posterior Mean of Nyström, SoR, DTC and SVGP)

Let  $\mathbf{Z} \in \mathbb{R}^{n \times m}$  be a set of distinct inducing inputs such that  $\text{rank}(\mathbf{K}_{\mathbf{XZ}}) = m \leq n$ . Then the posterior mean of the Nyström variants subset of regressors (SoR) and deterministic training conditional (DTC) is identical to the one of SVGP and given by

$$\begin{aligned} \mu(\cdot) &= k(\cdot, \mathbf{Z})(\mathbf{K}_{\mathbf{ZX}}\mathbf{K}_{\mathbf{XZ}} + \sigma^2\mathbf{K}_{\mathbf{ZZ}})^{-1}\mathbf{K}_{\mathbf{ZX}}(\mathbf{y} - \boldsymbol{\mu}) \\ &= q(\cdot, \mathbf{X})\mathbf{K}_{\mathbf{XZ}}(\mathbf{K}_{\mathbf{ZX}}(q(\mathbf{X}, \mathbf{X}) + \sigma^2\mathbf{I})\mathbf{K}_{\mathbf{XZ}})^{-1}\mathbf{K}_{\mathbf{ZX}}(\mathbf{y} - \boldsymbol{\mu}) \end{aligned} \quad (\text{S35})$$

*Proof.* First, note that by eqns. (16b) and (20b) of Quiñero-Candela and Rasmussen [20] the posterior mean of SoR and DTC is identical and given by

$$\mu(\cdot) = k(\cdot, \mathbf{Z})(\mathbf{K}_{\mathbf{ZX}}\mathbf{K}_{\mathbf{XZ}} + \sigma^2\mathbf{K}_{\mathbf{ZZ}})^{-1}\mathbf{K}_{\mathbf{ZX}}(\mathbf{y} - \boldsymbol{\mu})$$

Now, by Theorem 5 of Wild et al. [43] the posterior mean of SVGP for a fixed set of inducing points is equivalent to the Nyström approximation, which takes the form above. Recognizing that  $\mathbf{K}_{\mathbf{ZX}}\mathbf{K}_{\mathbf{XZ}} \in \mathbb{R}^{m \times m}$  is invertible, it holds that

$$\begin{aligned} \mu(\cdot) &= k(\cdot, \mathbf{Z})(\mathbf{K}_{\mathbf{ZX}}\mathbf{K}_{\mathbf{XZ}} + \sigma^2\mathbf{K}_{\mathbf{ZZ}})^{-1}\mathbf{K}_{\mathbf{ZX}}(\mathbf{y} - \boldsymbol{\mu}) \\ &= k(\cdot, \mathbf{Z})(\mathbf{K}_{\mathbf{ZZ}}(\mathbf{K}_{\mathbf{ZZ}}^{-1}\mathbf{K}_{\mathbf{ZX}}\mathbf{K}_{\mathbf{XZ}} + \sigma^2\mathbf{I}))^{-1}\mathbf{K}_{\mathbf{ZX}}(\mathbf{y} - \boldsymbol{\mu}) \\ &= k(\cdot, \mathbf{Z})\mathbf{K}_{\mathbf{ZZ}}^{-1}((\mathbf{K}_{\mathbf{ZX}}\mathbf{K}_{\mathbf{XZ}})^{-1}(\mathbf{K}_{\mathbf{ZX}}\mathbf{K}_{\mathbf{XZ}}\mathbf{K}_{\mathbf{ZZ}}^{-1}\mathbf{K}_{\mathbf{ZX}}\mathbf{K}_{\mathbf{XZ}} + \sigma^2\mathbf{K}_{\mathbf{ZX}}\mathbf{K}_{\mathbf{XZ}}))^{-1}\mathbf{K}_{\mathbf{ZX}}(\mathbf{y} - \boldsymbol{\mu}) \\ &= k(\cdot, \mathbf{Z})\mathbf{K}_{\mathbf{ZZ}}^{-1}\mathbf{K}_{\mathbf{ZX}}\mathbf{K}_{\mathbf{XZ}}(\mathbf{K}_{\mathbf{ZX}}(\mathbf{K}_{\mathbf{XZ}}\mathbf{K}_{\mathbf{ZZ}}^{-1}\mathbf{K}_{\mathbf{ZX}} + \sigma^2\mathbf{I})\mathbf{K}_{\mathbf{XZ}})^{-1}\mathbf{K}_{\mathbf{ZX}}(\mathbf{y} - \boldsymbol{\mu}) \\ &= q(\cdot, \mathbf{X})\mathbf{K}_{\mathbf{XZ}}(\mathbf{K}_{\mathbf{ZX}}(q(\mathbf{X}, \mathbf{X}) + \sigma^2\mathbf{I})\mathbf{K}_{\mathbf{XZ}})^{-1}\mathbf{K}_{\mathbf{ZX}}(\mathbf{y} - \boldsymbol{\mu}) \end{aligned}$$

This proves the claim.  $\square$

## S2 Theoretical Results and Proofs

### S2.1 Properties of Algorithm 1

**Lemma S1** (Geometric Properties of Algorithm 1)

Let  $i \in \{1, \dots, n\}$ , and assume  $\boldsymbol{\Sigma}_0$  is chosen such that  $\boldsymbol{\Sigma}_0\hat{\mathbf{K}}\mathbf{s}_j = \mathbf{s}_j$  for all  $j \leq i$  (e.g.  $\boldsymbol{\Sigma}_0 = \hat{\mathbf{K}}^{-1}$ ). Then it holds for the quantities computed by Algorithm 1 that

$$\text{span}\{\mathbf{S}_i\} = \text{span}\{\mathbf{D}_i\} \quad (\text{S36})$$

$$\mathbf{C}_i = \mathbf{D}_i(\mathbf{D}_i^\top\hat{\mathbf{K}}\mathbf{D}_i)^{-1}\mathbf{D}_i^\top = \mathbf{S}_i(\mathbf{S}_i^\top\hat{\mathbf{K}}\mathbf{S}_i)^{-1}\mathbf{S}_i^\top \quad (\text{S37})$$

$$\mathbf{C}_i\hat{\mathbf{K}} \text{ is the } \hat{\mathbf{K}}\text{-orthogonal projection onto } \text{span}\{\mathbf{D}_i\} \quad (\text{S38})$$

$$\boldsymbol{\Sigma}_i\hat{\mathbf{K}} \text{ is the } \hat{\mathbf{K}}\text{-orthogonal projection onto } \text{span}\{\mathbf{D}_i\}^{\perp \hat{\mathbf{K}}} \quad (\text{S39})$$

$$\mathbf{d}_i^\top\hat{\mathbf{K}}\mathbf{d}_j = 0 \quad \text{for all } j < i \quad (\text{S40})$$

where  $\mathbf{S}_i = (\mathbf{s}_1 \cdots \mathbf{s}_i) \in \mathbb{R}^{n \times i}$  and  $\mathbf{D}_i = (\mathbf{d}_1 \cdots \mathbf{d}_i) \in \mathbb{R}^{n \times i}$ .

*Proof.* We prove the claims by induction. We begin with the base case  $i = 1$ .

By assumption it holds that  $\mathbf{S}_1 = \mathbf{s}_1 = \Sigma_0 \hat{\mathbf{K}} \mathbf{s}_1 = \mathbf{d}_1 = \mathbf{D}_1$ . Now by Algorithm 1, we have  $\mathbf{C}_1 = \frac{1}{\eta_1} \mathbf{d}_1 \mathbf{d}_1^\top$ , which with the above proves (S37). By the batched form (S37) of  $\mathbf{C}_i$ , the statements (S38) and (S39) follow immediately. Finally,  $\hat{\mathbf{K}}$ -orthogonality for a single search direction holds trivially.

Now for the induction step  $i \rightarrow i+1$ . Assume that eqs. (S36) to (S40) hold for iteration  $i$ . Then we have that

$$\mathbf{d}_{i+1} = \Sigma_i \hat{\mathbf{K}} \mathbf{s}_{i+1} = \mathbf{s}_{i+1} - \mathbf{C}_i \hat{\mathbf{K}} \mathbf{s}_{i+1} \stackrel{(S37)}{=} \mathbf{s}_{i+1} - \mathbf{S}_i (\mathbf{S}_i^\top \hat{\mathbf{K}} \mathbf{S}_i)^{-1} \mathbf{S}_i^\top \hat{\mathbf{K}} \mathbf{s}_{i+1} \in \text{span}\{\mathbf{S}_{i+1}\}$$

By the induction hypothesis the above also implies  $\text{span}\{\mathbf{S}_{i+1}\} = \text{span}\{\mathbf{D}_{i+1}\}$ . This proves eq. (S36). Next, we have by the induction hypotheses (S37) and (S40) that

$$\begin{aligned} \mathbf{C}_{i+1} &= \mathbf{C}_i + \frac{1}{\eta} \mathbf{d}_{i+1} \mathbf{d}_{i+1}^\top \\ &= \mathbf{D}_i (\mathbf{D}_i^\top \hat{\mathbf{K}} \mathbf{D}_i)^{-1} \mathbf{D}_i^\top + \frac{1}{\eta_{i+1}} \mathbf{d}_{i+1} \mathbf{d}_{i+1}^\top \\ &= \sum_{k=1}^{i+1} \frac{1}{\eta_k} \mathbf{d}_k \mathbf{d}_k^\top \\ &= \mathbf{D}_{i+1} (\mathbf{D}_{i+1}^\top \hat{\mathbf{K}} \mathbf{D}_{i+1})^{-1} \mathbf{D}_{i+1}^\top \end{aligned}$$

This proves the first equality of eq. (S37). For the second, first recognize that an orthogonal projection onto a linear subspace  $\text{span}\{\mathbf{A}\}$  with respect to the  $\mathbf{B}$ -inner product is given by  $\mathbf{P}_\mathbf{A} = \mathbf{A}(\mathbf{A}^\top \mathbf{B} \mathbf{A})^{-1} \mathbf{A}^\top \mathbf{B}$ . The projection onto its  $\mathbf{B}$ -orthogonal subspace is given by  $\mathbf{P}_{\mathbf{A}^\perp \mathbf{B}} = \mathbf{I} - \mathbf{P}_\mathbf{A}$ . Therefore eqs. (S38) and (S39) follow directly from the above argument. Now since projection onto a subspace is unique and independent of the choice of basis, we have by  $\text{span}\{\mathbf{D}_{i+1}\} = \text{span}\{\mathbf{S}_{i+1}\}$  that

$$\mathbf{C}_i \hat{\mathbf{K}} = \mathbf{P}_{\mathbf{D}_{i+1}} = \mathbf{P}_{\mathbf{S}_{i+1}} = \mathbf{S}_i (\mathbf{S}_i^\top \hat{\mathbf{K}} \mathbf{S}_i)^{-1} \mathbf{S}_i^\top \hat{\mathbf{K}}$$

Now since  $\hat{\mathbf{K}}$  is non-singular, the second equality of eq. (S37) follows. Finally, we will prove  $\hat{\mathbf{K}}$ -orthogonality of the search directions. Let  $j < i+1$ , then it holds that

$$\mathbf{d}_{i+1}^\top \hat{\mathbf{K}} \mathbf{d}_j = \left( \underbrace{\Sigma_i \hat{\mathbf{K}} \mathbf{s}_{i+1}}_{\in \text{span}\{\mathbf{S}_i\}^\perp \hat{\mathbf{K}}} \right)^\top \hat{\mathbf{K}} \underbrace{\mathbf{d}_j}_{\in \text{span}\{\mathbf{S}_i\}} = 0$$

by eqs. (S36) and (S39). This completes the proof.  $\square$

#### Corollary S4

Let  $i \in \{1, \dots, n\}$ . It holds for  $\mathbf{C}_i \hat{\mathbf{K}}$ , the  $\hat{\mathbf{K}}$ -orthogonal projection onto  $\mathbf{S}_i$ , that

$$(\mathbf{C}_i \hat{\mathbf{K}})^2 = \mathbf{C}_i \hat{\mathbf{K}} \tag{S41}$$

$$\mathbf{C}_i \hat{\mathbf{K}} \mathbf{C}_i = \mathbf{C}_i \tag{S42}$$

Further for  $\mathbf{H}_i = \Sigma_i \hat{\mathbf{K}} = \mathbf{I} - \mathbf{C}_i \hat{\mathbf{K}}$  the  $\hat{\mathbf{K}}$ -orthogonal projection onto  $\mathbf{S}_i^\perp \hat{\mathbf{K}}$ , we have

$$\mathbf{H}_i^2 = \mathbf{H}_i \tag{S43}$$

$$\mathbf{H}_i^\top \hat{\mathbf{K}} \mathbf{H}_i = \mathbf{H}_i^\top \hat{\mathbf{K}} = \hat{\mathbf{K}} \mathbf{H}_i \tag{S44}$$

*Proof.* By Lemma S1, it holds that  $\mathbf{C}_i = \mathbf{S}_i (\mathbf{S}_i^\top \hat{\mathbf{K}} \mathbf{S}_i)^{-1} \mathbf{S}_i^\top$ . Therefore

$$\mathbf{C}_i \hat{\mathbf{K}} \mathbf{C}_i = \mathbf{S}_i (\mathbf{S}_i^\top \hat{\mathbf{K}} \mathbf{S}_i)^{-1} \mathbf{S}_i^\top \hat{\mathbf{K}} \mathbf{S}_i (\mathbf{S}_i^\top \hat{\mathbf{K}} \mathbf{S}_i)^{-1} \mathbf{S}_i^\top = \mathbf{C}_i.$$

This proves (S42) and (S41). Define  $\mathbf{H}_i = \mathbf{I} - \mathbf{C}_i \hat{\mathbf{K}}$ , then

$$\mathbf{H}_i \mathbf{H}_i = (\mathbf{I} - \mathbf{C}_i \hat{\mathbf{K}})(\mathbf{I} - \mathbf{C}_i \hat{\mathbf{K}}) = \mathbf{I} - 2\mathbf{C}_i \hat{\mathbf{K}} + (\mathbf{C}_i \hat{\mathbf{K}})^2 = \mathbf{I} - \mathbf{C}_i \hat{\mathbf{K}} = \mathbf{H}_i$$

as well as

$$\begin{aligned} \mathbf{H}_i^\top \hat{\mathbf{K}} \mathbf{H}_i &= (\mathbf{I} - \mathbf{C}_i \hat{\mathbf{K}})^\top \hat{\mathbf{K}} (\mathbf{I} - \mathbf{C}_i \hat{\mathbf{K}}) = (\hat{\mathbf{K}} - \hat{\mathbf{K}} \mathbf{C}_i \hat{\mathbf{K}}) (\mathbf{I} - \mathbf{C}_i \hat{\mathbf{K}}) \\ &= \hat{\mathbf{K}} - 2\hat{\mathbf{K}} \mathbf{C}_i \hat{\mathbf{K}} + \hat{\mathbf{K}} (\mathbf{C}_i \hat{\mathbf{K}})^2 \\ &= \hat{\mathbf{K}} - \hat{\mathbf{K}} \mathbf{C}_i \hat{\mathbf{K}} = \mathbf{H}_i^\top \hat{\mathbf{K}} = \hat{\mathbf{K}} \mathbf{H}_i. \end{aligned}$$

$\square$

**Lemma S2**

Let  $\Sigma_0 = \hat{K}^{-1}$ , then it holds that

$$C_i(\mathbf{y} - \boldsymbol{\mu}) = \mathbf{v}_i, \quad (\text{S45})$$

$$\Sigma_i(\mathbf{y} - \boldsymbol{\mu}) = \mathbf{v}_* - \mathbf{v}_i. \quad (\text{S46})$$

*Proof.* We prove the statement by induction. By assumption  $C_0(\mathbf{y} - \boldsymbol{\mu}) = \mathbf{v}_0$ . Now assume (S45) holds. Then for  $i \rightarrow i + 1$ , we have

$$C_{i+1}(\mathbf{y} - \boldsymbol{\mu}) = (C_i + \frac{1}{\eta_{i+1}} \mathbf{d}_{i+1} \mathbf{d}_{i+1}^\top)(\mathbf{y} - \boldsymbol{\mu}) \stackrel{\text{IH}}{=} \mathbf{v}_i + \frac{\mathbf{d}_{i+1}^\top(\mathbf{y} - \boldsymbol{\mu})}{\eta_{i+1}} \mathbf{d}_{i+1}$$

Now by the update to the representer weights in Algorithm 1 it suffices to show that  $\alpha_{i+1} = \mathbf{d}_{i+1}^\top(\mathbf{y} - \boldsymbol{\mu})$ . We have

$$\begin{aligned} \mathbf{d}_{i+1}^\top(\mathbf{y} - \boldsymbol{\mu}) &= (\Sigma_i \hat{K} \mathbf{s}_{i+1})^\top(\mathbf{y} - \boldsymbol{\mu}) = \mathbf{s}_{i+1}^\top \hat{K} \Sigma_i(\mathbf{y} - \boldsymbol{\mu}) \\ &= \mathbf{s}_{i+1}^\top \hat{K} (\hat{K}^{-1} - C_i)(\mathbf{y} - \boldsymbol{\mu}) \stackrel{\text{IH}}{=} \mathbf{s}_{i+1}^\top ((\mathbf{y} - \boldsymbol{\mu}) - \hat{K} \mathbf{v}_i) = \mathbf{s}_{i+1}^\top \mathbf{r}_i = \alpha_i. \end{aligned}$$

□

**Lemma S3**

Let  $\Sigma_0 = \hat{K}^{-1}$ ,  $C_0 = \mathbf{0}$  and consequently  $\mathbf{v}_0 = \mathbf{0}$ , then it holds for the residual at iteration  $i \in \{1, \dots, n\}$  that

$$\mathbf{r}_{i-1} = \hat{K}(\mathbf{v}_* - \mathbf{v}_{i-1}) \quad (\text{S47})$$

$$= \hat{K} \Sigma_{i-1} \hat{K} \mathbf{v}_* \quad (\text{S48})$$

$$= (\hat{K} - \mathbf{Q}_{i-1}) \mathbf{v}_*. \quad (\text{S49})$$

*Proof.* It holds by definition, that

$$\mathbf{r}_{i-1} = (\mathbf{y} - \boldsymbol{\mu}) - \hat{K} \mathbf{v}_{i-1} = \hat{K} \mathbf{v}_* - \hat{K} \mathbf{v}_{i-1} = \hat{K}(\mathbf{v}_* - \mathbf{v}_{i-1}).$$

Further we have by eq. (S46), that

$$= \hat{K} \Sigma_{i-1}(\mathbf{y} - \boldsymbol{\mu}) = \hat{K} \Sigma_{i-1} \hat{K} \mathbf{v}_*,$$

and finally, by the definition of the kernel matrix approximation in Algorithm 1, we obtain

$$= \hat{K} (\hat{K}^{-1} - C_{i-1}) \hat{K} \mathbf{v}_* = (\hat{K} - \mathbf{Q}_{i-1}) \mathbf{v}_*.$$

□

**Proposition S3** (Batch of Observations)

Let  $\Sigma_0$  such that  $\Sigma_0 \hat{K} \mathbf{s}_j = \mathbf{s}_j$  for all  $j \in \{1, \dots, i\}$ . Then after  $i$  iterations the posterior over the representer weights in (4) is equivalent to the one computed for a batch of observations, i.e.

$$\begin{aligned} \mathbf{v}_i &= \Sigma_0 \hat{K} \mathbf{S}_i (\mathbf{S}_i^\top \hat{K} \Sigma_0 \hat{K} \mathbf{S}_i)^{-1} \mathbf{S}_i^\top (\mathbf{y} - \boldsymbol{\mu}) \\ \Sigma_i &= \Sigma_0 - \Sigma_0 \hat{K} \mathbf{S}_i (\mathbf{S}_i^\top \hat{K} \Sigma_0 \hat{K} \mathbf{S}_i)^{-1} \mathbf{S}_i^\top \hat{K} \Sigma_0 \end{aligned}$$

*Proof.* This can be seen as a direct consequence of recursively applying Bayes' theorem

$$p(\mathbf{v}_* \mid \{\alpha_i\}_{i=1}^m, \{\mathbf{s}_i\}_{i=1}^m) = \frac{p(\alpha_m \mid \mathbf{s}_m, \mathbf{v}_*) p(\mathbf{v}_* \mid \{\alpha_i\}_{i=1}^{m-1}, \{\mathbf{s}_i\}_{i=1}^{m-1})}{\int p(\alpha_m \mid \mathbf{s}_m, \mathbf{v}_*) p(\mathbf{v}_* \mid \{\alpha_i\}_{i=1}^{m-1}, \{\mathbf{s}_i\}_{i=1}^{m-1}) d\mathbf{v}_*}.$$

However, here we also give a geometric proof based on the projection property of the precision matrix approximation  $C_i$ . By using eq. (S37) and the assumption on  $\Sigma_0$  we have that

$$\begin{aligned} C_i &= \mathbf{S}_i (\mathbf{S}_i^\top \hat{K} \mathbf{S}_i)^{-1} \mathbf{S}_i^\top = \Sigma_0 \hat{K} \mathbf{S}_i (\mathbf{S}_i^\top \hat{K} \Sigma_0 \hat{K} \mathbf{S}_i)^{-1} \mathbf{S}_i^\top \\ &= \Sigma_0 \hat{K} \mathbf{S}_i (\mathbf{S}_i^\top \hat{K} \Sigma_0 \hat{K} \mathbf{S}_i)^{-1} \mathbf{S}_i^\top \hat{K} \Sigma_0 \end{aligned}$$

This proves that

$$\Sigma_i = \Sigma_0 - C_i = \Sigma_0 - \Sigma_0 \hat{K} \mathbf{S}_i (\mathbf{S}_i^\top \hat{K} \Sigma_0 \hat{K} \mathbf{S}_i)^{-1} \mathbf{S}_i^\top \hat{K} \Sigma_0$$

Now by eq. (S45) it holds that  $C_i(\mathbf{y} - \boldsymbol{\mu}) = \mathbf{v}_i$ . This proves the claim. □



**Proposition S4** (Posterior Contraction)

Let  $\mathbf{S}_i \in \mathbb{R}^{n \times i}$  be the actions chosen by Algorithm 1, then its posterior contracts as

$$\text{tr}(\boldsymbol{\Sigma}_i \boldsymbol{\Sigma}_0^{-1}) = \text{tr}(\boldsymbol{\Sigma}_i \hat{\mathbf{K}}) = n - \text{rank}(\mathbf{S}_i).$$

*Proof.* Since  $\boldsymbol{\Sigma}_0 = \hat{\mathbf{K}}^{-1}$ , we have by eq. (S37), that

$$\begin{aligned} \text{tr}(\boldsymbol{\Sigma}_i \boldsymbol{\Sigma}_0^{-1}) &= \text{tr}((\boldsymbol{\Sigma}_0 - \mathbf{C}_i) \hat{\mathbf{K}}) \\ &= \text{tr}(\mathbf{I}_n - \mathbf{S}_i (\mathbf{S}_i^\top \hat{\mathbf{K}} \mathbf{S}_i)^\dagger \mathbf{S}_i^\top \hat{\mathbf{K}}) \\ &= \text{tr}(\mathbf{I}_n) - \text{tr}(\underbrace{\mathbf{S}_i^\top \hat{\mathbf{K}} \mathbf{S}_i (\mathbf{S}_i^\top \hat{\mathbf{K}} \mathbf{S}_i)^\dagger}_{\in \mathbb{R}^{i \times i}}) \\ &= n - \text{rank}(\mathbf{S}_i) \end{aligned}$$

Now, if the actions  $\mathbf{S}_i$  are chosen linearly independent, then  $\text{rank}(\mathbf{S}_i) = i$ .  $\square$

**Theorem S7** (Online GP Approximation with Algorithm 1)

Let  $n, n' \in \mathbb{N}$  and consider training data sets  $\mathbf{X} \in \mathbb{R}^{n \times d}$ ,  $\mathbf{y} \in \mathbb{R}^n$  and  $\mathbf{X}' \in \mathbb{R}^{n' \times d}$ ,  $\mathbf{y}' \in \mathbb{R}^{n'}$ . Consider two sequences of actions  $(\mathbf{s}_i)_{i=1}^n \in \mathbb{R}^n$  and  $(\tilde{\mathbf{s}}_i)_{i=1}^{n+n'} \in \mathbb{R}^{n+n'}$  such that for all  $i \in \{1, \dots, n\}$ , it holds that

$$\tilde{\mathbf{s}}_i = \begin{pmatrix} \mathbf{s}_i \\ \mathbf{0} \end{pmatrix} \quad (\text{S50})$$

Then the posterior returned by Algorithm 1 for the dataset  $(\mathbf{X}, \mathbf{y})$  using actions  $\mathbf{s}_i$  is identical to the posterior returned by Algorithm 1 for the extended dataset using actions  $\tilde{\mathbf{s}}_i$ , i.e. it holds for any  $i \in \{1, \dots, n\}$ , that

$$\text{ITERGP}(\mu, k, \mathbf{X}, \mathbf{y}, (\mathbf{s}_i)_i) = (\mu_i, k_i) = (\tilde{\mu}_i, \tilde{k}_i) = \text{ITERGP}\left(\mu, k, \begin{pmatrix} \mathbf{X} \\ \mathbf{X}' \end{pmatrix}, \begin{pmatrix} \mathbf{y} \\ \mathbf{y}' \end{pmatrix}, (\tilde{\mathbf{s}}_i)_i\right).$$

*Proof.* Define  $\tilde{\mathbf{X}} = \begin{pmatrix} \mathbf{X} \\ \mathbf{X}' \end{pmatrix}$  and  $\tilde{\mathbf{y}} = \begin{pmatrix} \mathbf{y} \\ \mathbf{y}' \end{pmatrix}$ . We begin by showing that the search directions of both methods satisfy

$$\mathbf{d}'_i = \begin{pmatrix} \mathbf{d}_i \\ \mathbf{0} \end{pmatrix}. \quad (\text{S51})$$

We proceed by induction. For  $i = 0$  it holds by definition of Algorithm 1 and eq. (S50) that

$$\tilde{\mathbf{d}}_0 = \tilde{\mathbf{s}}_0 = \begin{pmatrix} \mathbf{s}_0 \\ \mathbf{0} \end{pmatrix} = \begin{pmatrix} \mathbf{d}_0 \\ \mathbf{0} \end{pmatrix}. \quad (\text{S52})$$

Now for the induction step  $i \rightarrow i + 1$ , assume that (S51) holds for  $j \in \{1, \dots, i\}$ . Then, we have

$$\begin{aligned} \tilde{\mathbf{d}}_{i+1} &= \tilde{\boldsymbol{\Sigma}}_{i-1}(k(\tilde{\mathbf{X}}, \tilde{\mathbf{X}}) + \sigma^2 \mathbf{I}_{n+n'}) \tilde{\mathbf{s}}_{i+1} \\ &= (\mathbf{I}_{n+n'} - \tilde{\mathbf{C}}_i(k(\tilde{\mathbf{X}}, \tilde{\mathbf{X}}) + \sigma^2 \mathbf{I}_{n+n'})) \tilde{\mathbf{s}}_{i+1} \\ &= \tilde{\mathbf{s}}_{i+1} - \sum_{j=1}^i \frac{1}{\tilde{\eta}_j} \tilde{\mathbf{d}}_j (\tilde{\mathbf{d}}_j)^\top (k(\tilde{\mathbf{X}}, \tilde{\mathbf{X}}) + \sigma^2 \mathbf{I}_{n+n'}) \tilde{\mathbf{s}}_{i+1} \\ &\stackrel{\text{IH}}{=} \begin{pmatrix} \mathbf{s}_{i+1} \\ \mathbf{0} \end{pmatrix} - \sum_{j=1}^i \frac{1}{\tilde{\eta}_j} \begin{pmatrix} \mathbf{d}_j \\ \mathbf{0} \end{pmatrix} \begin{pmatrix} \mathbf{d}_j^\top & \mathbf{0} \end{pmatrix} \begin{pmatrix} k(\mathbf{X}, \mathbf{X}) + \mathbf{I}_n & k(\mathbf{X}, \mathbf{X}') \\ k(\mathbf{X}', \mathbf{X}) & k(\mathbf{X}', \mathbf{X}') + \mathbf{I}_{n'} \end{pmatrix} \begin{pmatrix} \mathbf{s}_{i+1} \\ \mathbf{0} \end{pmatrix} \\ &= \begin{pmatrix} \mathbf{s}_{i+1} - \sum_{j=1}^i \frac{1}{\tilde{\eta}_j} \mathbf{d}_j (\mathbf{d}_j)^\top \hat{\mathbf{K}} \mathbf{s}_{i+1} \\ \mathbf{0} \end{pmatrix} \\ &= \begin{pmatrix} \mathbf{d}_{i+1} \\ \mathbf{0} \end{pmatrix} \end{aligned}$$

where we used that  $\tilde{\eta}_j = \tilde{s}_j^\top (k(\tilde{\mathbf{X}}, \tilde{\mathbf{X}}) + \sigma^2 \mathbf{I}_{n+n'}) \tilde{\mathbf{d}}_j = \mathbf{s}_j^\top \hat{\mathbf{K}} \mathbf{d}_j = \eta_j$ . This proves eq. (S51). Now recognize that

$$\begin{aligned}
\tilde{\alpha}_j &= \tilde{s}_j^\top \tilde{\mathbf{r}}_j = \tilde{s}_j^\top (\tilde{\mathbf{y}} - \tilde{\boldsymbol{\mu}} - \tilde{\mathbf{K}} \tilde{\mathbf{C}}_i (\tilde{\mathbf{y}} - \tilde{\boldsymbol{\mu}})) \\
&= \tilde{s}_j^\top (\tilde{\mathbf{y}} - \tilde{\boldsymbol{\mu}} - (\tilde{\mathbf{K}} + \sigma^2 \mathbf{I}) \sum_{\ell=1}^j \frac{1}{\tilde{\eta}_\ell} \tilde{\mathbf{d}}_\ell \tilde{\mathbf{d}}_\ell^\top (\tilde{\mathbf{y}} - \tilde{\boldsymbol{\mu}})) \\
&= \mathbf{s}_j^\top (\mathbf{y} - \boldsymbol{\mu}) - \sum_{\ell=1}^j \frac{1}{\eta_\ell} \mathbf{s}_j^\top \hat{\mathbf{K}} \mathbf{d}_\ell \mathbf{d}_\ell^\top (\mathbf{y} - \boldsymbol{\mu}) \\
&= \mathbf{s}_j^\top (\mathbf{y} - \boldsymbol{\mu} - \hat{\mathbf{K}} \mathbf{C}_j (\mathbf{y} - \boldsymbol{\mu})) \\
&= \mathbf{s}_j^\top \mathbf{r}_j \\
&= \alpha_j
\end{aligned}$$

Therefore, we finally have that

$$\begin{aligned}
\tilde{\boldsymbol{\mu}}_i(\cdot) &= \boldsymbol{\mu}(\cdot) + k(\cdot, \tilde{\mathbf{X}}) \tilde{\mathbf{v}}_i = \boldsymbol{\mu}(\cdot) + k(\cdot, \tilde{\mathbf{X}}) \sum_{j=1}^i \frac{\tilde{\alpha}_j}{\tilde{\eta}_j} \tilde{\mathbf{d}}_j \\
&= \boldsymbol{\mu}(\cdot) + k(\cdot, \mathbf{X}) \mathbf{v}_i
\end{aligned}$$

as well as

$$\begin{aligned}
\tilde{k}_i(\cdot, \cdot) &= k(\cdot, \cdot) - k(\cdot, \tilde{\mathbf{X}}) \tilde{\mathbf{C}}_i k(\tilde{\mathbf{X}}, \cdot) = k(\cdot, \cdot) - k(\cdot, \tilde{\mathbf{X}}) \sum_{j=1}^i \frac{1}{\tilde{\eta}_j} \tilde{\mathbf{d}}_j (\tilde{\mathbf{d}}_j)^\top k(\tilde{\mathbf{X}}, \cdot) \\
&= k(\cdot, \cdot) - k(\cdot, \mathbf{X}) \sum_{j=1}^i \frac{1}{\eta_j} \mathbf{d}_j (\mathbf{d}_j)^\top k(\mathbf{X}, \cdot) = k(\cdot, \cdot) - k(\cdot, \mathbf{X}) \mathbf{C}_i k(\mathbf{X}, \cdot) = k_i(\cdot, \cdot).
\end{aligned}$$

□

### Remark S2 (Streaming Gaussian Processes)

Theorem S7 shows that any variant of IterGP can be used in the online setting where data arrives sequentially *while* the algorithm is running. Now, if we assume data points arrive one at a time, we choose unit vector actions (IterGP-Chol) and perform one iteration of Algorithm 1 after each data point, then Algorithm 1 simply computes the mathematical GP posterior.

## S2.2 Approximation of Representer Weights

### Proposition 2 (Relative Error Bound for the Representer Weights)

For any choice of actions a relative error bound  $\rho(i)$ , s.t.  $\|\mathbf{v}_* - \mathbf{v}_i\|_{\hat{\mathbf{K}}} \leq \rho(i) \|\mathbf{v}_*\|_{\hat{\mathbf{K}}}$  is given by

$$\rho(i) = \underbrace{(\bar{\mathbf{v}}_*^\top (\mathbf{I} - \mathbf{C}_i \hat{\mathbf{K}}) \bar{\mathbf{v}}_*)}_{\text{projection onto span}\{\mathbf{S}_i\}^{\perp \hat{\mathbf{K}}}}^{\frac{1}{2}} \leq \lambda_{\max}(\mathbf{I} - \mathbf{C}_i \hat{\mathbf{K}}) \leq 1 \quad (9)$$

where  $\bar{\mathbf{v}}_* = \mathbf{v}_* / \|\mathbf{v}_*\|_{\hat{\mathbf{K}}}$ . If the actions  $\{\mathbf{s}_i\}_{i=1}^n$  are linearly independent, then  $\rho(i) \leq \delta_{n=i}$ .

*Proof.* Define  $\mathbf{H}_i = \boldsymbol{\Sigma}_i \hat{\mathbf{K}} = \mathbf{I} - \mathbf{C}_i \hat{\mathbf{K}}$ . We have by Lemma S2, that

$$\|\mathbf{v}_* - \mathbf{v}_i\|_{\hat{\mathbf{K}}}^2 = \|\mathbf{H}_i \mathbf{v}_*\|_{\hat{\mathbf{K}}}^2 = (\mathbf{H}_i \mathbf{v}_*)^\top \hat{\mathbf{K}} \mathbf{H}_i \mathbf{v}_* \stackrel{(S44)}{=} \mathbf{v}_*^\top \mathbf{H}_i \mathbf{v}_* = \bar{\mathbf{v}}_*^\top \mathbf{H}_i \bar{\mathbf{v}}_* \|\mathbf{v}_*\|_{\hat{\mathbf{K}}}^2$$

This proves the first equality of Proposition 2. Further it holds that

$$\begin{aligned}
\|\mathbf{H}_i \mathbf{v}_*\|_{\hat{\mathbf{K}}} &= \|\hat{\mathbf{K}}^{\frac{1}{2}} \mathbf{H}_i \mathbf{v}_*\|_2 = \|(\mathbf{I} - \hat{\mathbf{K}}^{\frac{1}{2}} \mathbf{C}_i \hat{\mathbf{K}}^{\frac{1}{2}}) \hat{\mathbf{K}}^{\frac{1}{2}} \mathbf{v}_*\|_2 \leq \|\mathbf{I} - \hat{\mathbf{K}}^{\frac{1}{2}} \mathbf{C}_i \hat{\mathbf{K}}^{\frac{1}{2}}\|_2 \|\mathbf{v}_*\|_{\hat{\mathbf{K}}} \\
&= \lambda_{\max}(\mathbf{I} - \hat{\mathbf{K}}^{\frac{1}{2}} \mathbf{C}_i \hat{\mathbf{K}}^{\frac{1}{2}}) \|\mathbf{v}_*\|_{\hat{\mathbf{K}}}.
\end{aligned}$$

Now by Weyl's inequality and the fact that  $\hat{\mathbf{K}}^{\frac{1}{2}} \mathbf{C}_i \hat{\mathbf{K}}^{\frac{1}{2}}$  is positive semi-definite, it holds that

$$\lambda_{\max}(\mathbf{H}_i) = \lambda_{\max}(\mathbf{I} - \hat{\mathbf{K}}^{\frac{1}{2}} \mathbf{C}_i \hat{\mathbf{K}}^{\frac{1}{2}}) \leq \lambda_{\max}(\mathbf{I}) - \lambda_{\min}(\hat{\mathbf{K}}^{\frac{1}{2}} \mathbf{C}_i \hat{\mathbf{K}}^{\frac{1}{2}}) \leq 1.$$

Now, recall that similar matrices  $\mathbf{A}$  and  $\mathbf{B} = \mathbf{P}^{-1}\mathbf{A}\mathbf{P}$  have the same eigenvalues. Therefore

$$\mathbf{I} - \hat{\mathbf{K}}^{\frac{1}{2}}\mathbf{C}_i\hat{\mathbf{K}}^{\frac{1}{2}} = \hat{\mathbf{K}}^{\frac{1}{2}}(\mathbf{I} - \mathbf{C}_i\hat{\mathbf{K}})\hat{\mathbf{K}}^{-\frac{1}{2}}$$

and  $\mathbf{I} - \mathbf{C}_i\hat{\mathbf{K}}$  have the same eigenvalues. Finally, since by eq. (S39)  $\mathbf{H}_i$  is a projection onto  $\text{span}\{\mathbf{S}_i\}^{\perp_{\hat{\mathbf{K}}}}$ , it has full rank at iteration  $n$  if the actions are linearly independent and therefore  $\lambda_{\max}(\mathbf{H}_n) = 1$ . This proves the claim.  $\square$

### S2.3 Convergence Analysis of the Posterior Mean Approximation

**Theorem 1** (Convergence in RKHS Norm of the Posterior Mean Approximation)

Let  $\mathcal{H}_k$  be the RKHS associated with kernel  $k(\cdot, \cdot)$ ,  $\sigma^2 > 0$  and let  $\mu_* - \mu \in \mathcal{H}_k$  be the unique solution to the regularized empirical risk minimization problem

$$\arg \min_{f \in \mathcal{H}_k} \frac{1}{n} \left( \sum_{j=1}^n (f(\mathbf{x}_j) - y_j + \mu(\mathbf{x}_j))^2 + \sigma^2 \|f\|_{\mathcal{H}_k}^2 \right) \quad (11)$$

which is equivalent to the mathematical posterior mean up to shift by the prior  $\mu$  [e.g. 1, Sec. 6.2]. Then for  $i \in \{0, \dots, n\}$  the posterior mean  $\mu_i(\cdot)$  computed by Algorithm 1 satisfies

$$\boxed{\|\mu_* - \mu_i\|_{\mathcal{H}_k} \leq \rho(i)c(\sigma^2)\|\mu_* - \mu_0\|_{\mathcal{H}_k}} \quad (12)$$

where  $\mu_0 = \mu$  is the prior mean and the constant  $c(\sigma^2) = \sqrt{1 + \frac{\sigma^2}{\lambda_{\min}(\mathbf{K})}} \rightarrow 1$  as  $\sigma^2 \rightarrow 0$ .

*Proof.* Let  $\rho(i)$  such that  $\|\mathbf{v}_* - \mathbf{v}_i\|_{\hat{\mathbf{K}}} \leq \rho(i)\|\mathbf{v}_* - \mathbf{v}_0\|_{\hat{\mathbf{K}}}$ , where  $\mathbf{v}_0 = \mathbf{0}$ . Then, we have for  $i \in \{0, \dots, n\}$ , that

$$\begin{aligned} \|\mathbf{v}_* - \mathbf{v}_i\|_{\hat{\mathbf{K}}}^2 &\leq \|\mathbf{v}_* - \mathbf{v}_i\|_{\hat{\mathbf{K}}}^2 \leq \rho(i)^2 \|\mathbf{v}_* - \mathbf{v}_0\|_{\hat{\mathbf{K}}}^2 \\ &= \rho(i)^2 \left( \|\mathbf{v}_* - \mathbf{v}_0\|_{\hat{\mathbf{K}}}^2 + \sigma^2 \frac{1}{\lambda_{\min}(\mathbf{K})} \underbrace{\lambda_{\min}(\mathbf{K}) \|\mathbf{v}_* - \mathbf{v}_0\|_2^2}_{\leq \|\mathbf{v}_* - \mathbf{v}_0\|_{\hat{\mathbf{K}}}^2} \right) \\ &\leq \rho(i)^2 \left( 1 + \frac{\sigma^2}{\lambda_{\min}(\mathbf{K})} \right) \|\mathbf{v}_* - \mathbf{v}_0\|_{\hat{\mathbf{K}}}^2 \end{aligned}$$

Now by assumption  $\mu_i(\cdot) = \mu(\cdot) + \sum_{j=1}^n (\mathbf{v}_i)_j k(\cdot, \mathbf{x}_j) = \mu(\cdot) + k(\cdot, \mathbf{X})\mathbf{C}_i\mathbf{y}$ . By the reproducing property we obtain for  $\Delta = \mathbf{v}_* - \mathbf{v}_i$  that

$$\begin{aligned} \|\mathbf{v}_* - \mathbf{v}_i\|_{\hat{\mathbf{K}}}^2 &= \Delta^\top \mathbf{K} \Delta \\ &= \sum_{\ell=1}^n \sum_{j=1}^n \Delta_\ell \Delta_j k(\mathbf{x}_\ell, \mathbf{x}_j) \\ &= \sum_{\ell=1}^n \sum_{j=1}^n \Delta_\ell \Delta_j \langle k(\cdot, \mathbf{x}_\ell), k(\cdot, \mathbf{x}_j) \rangle_{\mathcal{H}_k} && k \text{ is the reproducing kernel of } \mathcal{H}_k \\ &= \left\langle \sum_{\ell=1}^n \Delta_\ell k(\cdot, \mathbf{x}_\ell), \sum_{j=1}^n \Delta_j k(\cdot, \mathbf{x}_j) \right\rangle_{\mathcal{H}_k} \\ &= \left\| \sum_{\ell=1}^n \Delta_\ell k(\cdot, \mathbf{x}_\ell) \right\|_{\mathcal{H}_k}^2 \\ &= \left\| \sum_{\ell=1}^n (\mathbf{v}_*)_\ell k(\cdot, \mathbf{x}_\ell) - \sum_{\ell=1}^n (\mathbf{v}_i)_\ell k(\cdot, \mathbf{x}_\ell) \right\|_{\mathcal{H}_k}^2 \\ &= \|\mu_* - \mu_i\|_{\mathcal{H}_k}^2 && \text{See Theorem 3.4 in Kanagawa et al. [36]} \end{aligned}$$

Combining the above and setting  $c(\sigma^2) = 1 + \frac{\sigma^2}{\lambda_{\min}(\mathbf{K})}$  we obtain

$$\|\mu_* - \mu_i\|_{\mathcal{H}_k} = \|\mathbf{v}_* - \mathbf{v}_i\|_{\hat{\mathbf{K}}} \leq \rho(i)c(\sigma^2)\|\mathbf{v}_* - \mathbf{v}_0\|_{\hat{\mathbf{K}}} = \rho(i)c(\sigma^2)\|\mu_* - \mu_0\|_{\mathcal{H}_k}. \quad \square$$

## S2.4 Combined Uncertainty as Worst Case Error

**Theorem 2** (Combined and Computational Uncertainty as Worst Case Errors)

Let  $\sigma^2 \geq 0$  and let  $k_i(\cdot, \cdot) = k_*(\cdot, \cdot) + k_i^{\text{comp}}(\cdot, \cdot)$  be the combined uncertainty computed by Algorithm 1. Then, for any  $\mathbf{x} \in \mathcal{X}$  (assuming  $\mathbf{x} \notin \mathbf{X}$  if  $\sigma^2 > 0$ ) we have

$$\sup_{g \in \mathcal{H}_{k^\sigma} : \|g\|_{\mathcal{H}_{k^\sigma}} \leq 1} \overbrace{g(\mathbf{x}) - \mu_*^g(\mathbf{x})}^{\text{error of approximate posterior mean } \color{purple}\bullet} + \underbrace{\mu_*^g(\mathbf{x}) - \mu_i^g(\mathbf{x})}_{\text{error of math. post. mean } \color{blue}\bullet, \text{ computational error } \color{green}\bullet} = \sqrt{k_i(\mathbf{x}, \mathbf{x}) + \sigma^2}, \quad \text{and} \quad (13)$$

$$\sup_{g \in \mathcal{H}_{k^\sigma} : \|g\|_{\mathcal{H}_{k^\sigma}} \leq 1} \underbrace{\mu_*^g(\mathbf{x}) - \mu_i^g(\mathbf{x})}_{\text{computational error } \color{green}\bullet} = \sqrt{k_i^{\text{comp}}(\mathbf{x}, \mathbf{x})} \quad (14)$$

where  $\mu_*^g(\cdot) = k(\cdot, \mathbf{X})\hat{\mathbf{K}}^{-1}g(\mathbf{X})$  is the mathematical and  $\mu_i^g(\cdot) = k(\cdot, \mathbf{X})\mathbf{C}_i g(\mathbf{X})$  IterGP's posterior mean for the latent function  $g \in \mathcal{H}_{k^\sigma}$ . If  $\sigma^2 = 0$ , then the above also holds for  $\mathbf{x} \in \mathbf{X}$ .

*Proof.* Let  $\mathbf{x}_0 = \mathbf{x}$ ,  $c_0 = 1$  and  $c_j = -(\mathbf{C}_i k^\sigma(\mathbf{X}, \mathbf{x}))_j$  for  $j = 1, \dots, n$ , where  $k^\sigma(\cdot, \cdot) := k(\cdot, \cdot) + \sigma^2 \delta(\cdot, \cdot)$ . Then by Lemma 3.9 of Kanagawa et al. [36], it holds that

$$\begin{aligned} \left( \sup_{g \in \mathcal{H}_{k^\sigma} : \|g\|_{\mathcal{H}_{k^\sigma}} \leq 1} (g(\mathbf{x}) - \mu_i^g(\mathbf{x})) \right)^2 &= \left( \sup_{g \in \mathcal{H}_{k^\sigma} : \|g\|_{\mathcal{H}_{k^\sigma}} \leq 1} \sum_{j=0}^n c_j g(\mathbf{x}_j) \right)^2 \\ &= \left\| k^\sigma(\cdot, \mathbf{x}_0) - \sum_{j=1}^n k(\mathbf{x}, \mathbf{x}_j) \mathbf{C}_i k^\sigma(\cdot, \mathbf{x}_j) \right\|_{\mathcal{H}_{k^\sigma}}^2 \\ &= \|k^\sigma(\cdot, \mathbf{x}) - k(\mathbf{x}, \mathbf{X}) \mathbf{C}_i k^\sigma(\mathbf{X}, \cdot)\|_{\mathcal{H}_{k^\sigma}}^2 \\ &= \langle k^\sigma(\cdot, \mathbf{x}), k^\sigma(\cdot, \mathbf{x}) \rangle_{\mathcal{H}_{k^\sigma}} - 2 \langle k^\sigma(\cdot, \mathbf{x}), k(\mathbf{x}, \mathbf{X}) \mathbf{C}_i k^\sigma(\mathbf{X}, \cdot) \rangle_{\mathcal{H}_{k^\sigma}} \\ &\quad + \langle k(\mathbf{x}, \mathbf{X}) \mathbf{C}_i k^\sigma(\mathbf{X}, \cdot), k(\mathbf{x}, \mathbf{X}) \mathbf{C}_i k^\sigma(\mathbf{X}, \cdot) \rangle_{\mathcal{H}_{k^\sigma}} \end{aligned}$$

Now by the reproducing property, it follows that

$$= k^\sigma(\mathbf{x}, \mathbf{x}) - 2k^\sigma(\mathbf{x}, \mathbf{X}) \mathbf{C}_i k^\sigma(\mathbf{X}, \mathbf{x}) + k^\sigma(\mathbf{x}, \mathbf{X}) \mathbf{C}_i k^\sigma(\mathbf{X}, \mathbf{X}) \mathbf{C}_i k^\sigma(\mathbf{X}, \mathbf{x})$$

If  $\sigma^2 > 0$  and  $\mathbf{x} \neq \mathbf{x}_j$  or if  $\sigma^2 = 0$ , it holds that  $k^\sigma(\mathbf{x}, \mathbf{X}) = k(\mathbf{x}, \mathbf{X})$ . Further by definition  $k^\sigma(\mathbf{X}, \mathbf{X}) = \hat{\mathbf{K}}$  and finally by (S42), it holds that  $\mathbf{C}_i \hat{\mathbf{K}} \mathbf{C}_i = \mathbf{C}_i$ . Therefore we have

$$\begin{aligned} &= k(\mathbf{x}, \mathbf{x}) + \sigma^2 - 2k(\mathbf{x}, \mathbf{X}) \mathbf{C}_i k(\mathbf{X}, \mathbf{x}) + k(\mathbf{x}, \mathbf{X}) \mathbf{C}_i \hat{\mathbf{K}} \mathbf{C}_i k(\mathbf{X}, \mathbf{x}) \\ &= k(\mathbf{x}, \mathbf{x}) - k(\mathbf{x}, \mathbf{X}) \mathbf{C}_i k(\mathbf{X}, \mathbf{x}) + \sigma^2 \\ &= k_i(\mathbf{x}, \mathbf{x}) + \sigma^2 \end{aligned}$$

We prove eq. (14) by an analogous argument. Choose  $c_j := ((\hat{\mathbf{K}}^{-1} - \mathbf{C}_i)k^\sigma(\mathbf{X}, \mathbf{x}))_j$ . We have

$$\begin{aligned} \left( \sup_{g \in \mathcal{H}_{k^\sigma} : \|g\|_{\mathcal{H}_{k^\sigma}} \leq 1} (\mu_*^g(\mathbf{x}) - \mu_i^g(\mathbf{x})) \right)^2 &= \left( \sup_{g \in \mathcal{H}_{k^\sigma} : \|g\|_{\mathcal{H}_{k^\sigma}} \leq 1} \sum_{j=0}^n c_j g(\mathbf{x}_j) \right)^2 \\ &= \left\| \sum_{j=1}^n k(\mathbf{x}, \mathbf{x}_j) (\hat{\mathbf{K}}^{-1} - \mathbf{C}_i) k^\sigma(\cdot, \mathbf{x}_j) \right\|_{\mathcal{H}_{k^\sigma}}^2 \\ &= \|k(\mathbf{x}, \mathbf{X}) (\hat{\mathbf{K}}^{-1} - \mathbf{C}_i) k^\sigma(\mathbf{X}, \cdot)\|_{\mathcal{H}_{k^\sigma}}^2 \\ &= k^\sigma(\mathbf{x}, \mathbf{X}) \hat{\mathbf{K}}^{-1} \hat{\mathbf{K}} \hat{\mathbf{K}}^{-1} k^\sigma(\mathbf{X}, \mathbf{x}) - 2k^\sigma(\mathbf{x}, \mathbf{X}) \hat{\mathbf{K}}^{-1} \hat{\mathbf{K}} \mathbf{C}_i k^\sigma(\mathbf{X}, \mathbf{x}) + k^\sigma(\mathbf{x}, \mathbf{X}) \mathbf{C}_i \hat{\mathbf{K}} \mathbf{C}_i k^\sigma(\mathbf{X}, \mathbf{x}) \end{aligned}$$

Again, we use that  $k^\sigma(\mathbf{x}, \mathbf{X}) = k(\mathbf{x}, \mathbf{X})$  by assumption and (S42). Therefore

$$\begin{aligned} &= k(\mathbf{x}, \mathbf{X}) (\hat{\mathbf{K}}^{-1} - \mathbf{C}_i) k(\mathbf{X}, \mathbf{x}) \\ &= k_i^{\text{comp}}(\mathbf{x}, \mathbf{x}) \end{aligned}$$

This concludes the proof.  $\square$

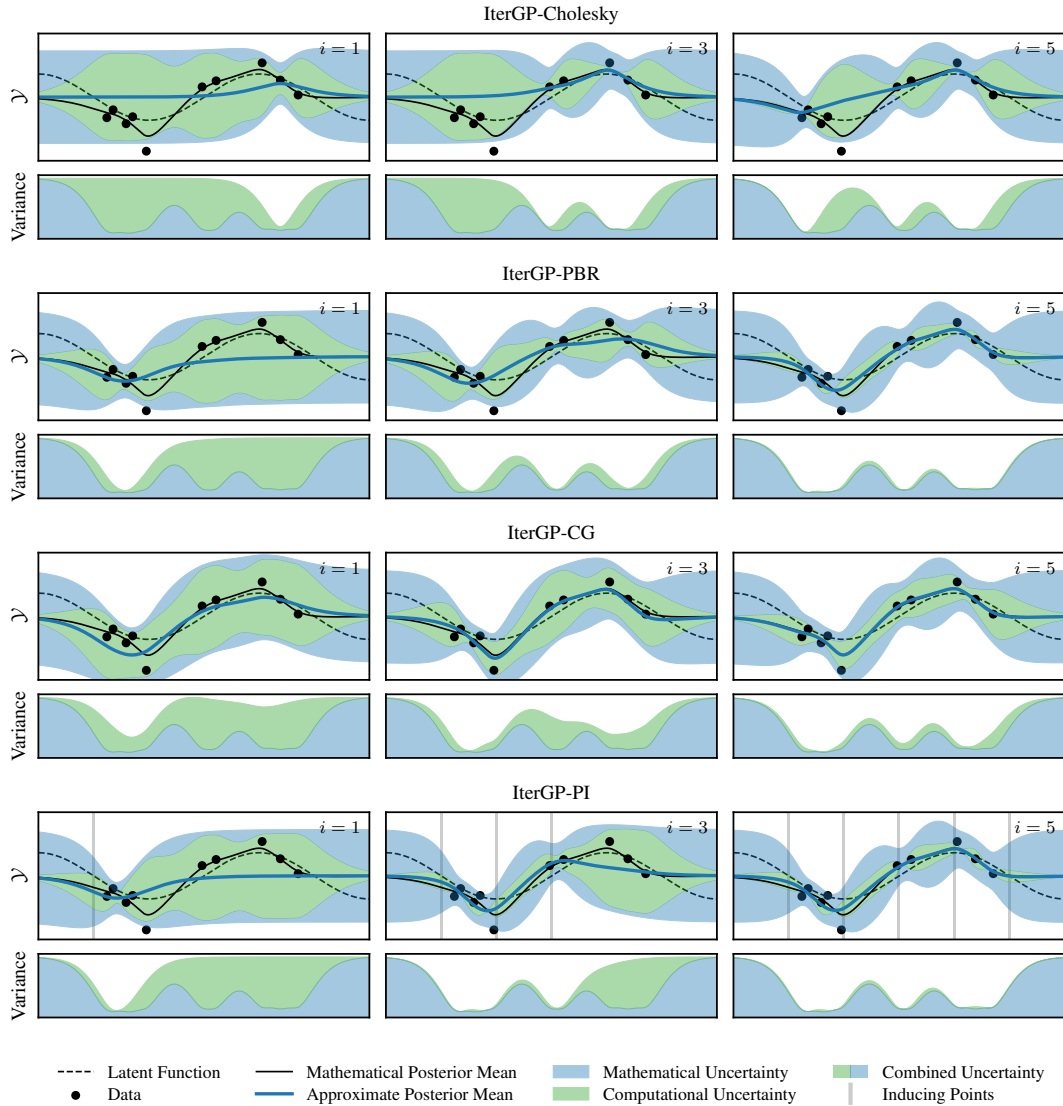

Figure S3: *Illustration of IterGP analogs of commonly used GP approximations.*

## S3 Implementation of Algorithm 1

### S3.1 Policy Choice

As illustrated in Figure 2, the choice of policy of Algorithm 1 determines where computation in input space is targeted and therefore where the combined posterior contracts first. However, the policy also determines whether the error in the posterior mean or (co-)variance are predominantly reduced first, as Figure S3 shows (cf. IterGP-Chol and IterGP-PBR). Therefore the policy choice is application-dependent. If I am primarily interested in the predictive mean, I may select residual actions (IterGP-CG). If downstream I am making use of the predictive uncertainty, I may want to contract uncertainty globally as quickly as possible at the expense of predictive accuracy (IterGP-PI). Such a choice is not unique to IterGP, but necessary whenever we select a GP approximation. What IterGP adds is computation-aware, meaningful uncertainty quantification in the sense of Corollary 1 no matter the choice of policy.

### S3.2 Stopping Criterion

In our implementation of Algorithm 1 we use the following two stopping criteria. Our computational budget can be directly controlled by specifying a *maximum number of iterations*, since each iteration of IterGP needs the same number of matrix-vector multiplies. Alternatively, we terminate if the *absolute or relative norm of the residual* are sufficiently small, i.e. if

$$\|\mathbf{r}_i\|_2 < \delta_{\text{abstol}} \quad \text{or} \quad \|\mathbf{r}_i\|_2 < \delta_{\text{reltol}} \|\mathbf{y}\|_2. \quad (\text{S53})$$

Of course other choices are possible. From a probabilistic numerics standpoint one may want to terminate once the combined marginal uncertainty at the training data is sufficiently small relative to the observation noise.

### S3.3 Efficient Sampling from the Combined Posterior

Sampling from an exact GP posterior has cubic cost  $\mathcal{O}(n_\diamond^3)$  in the number of evaluation points  $n_\diamond$ , which is prohibitive for many useful downstream applications such as numerical integration over the posterior using Monte-Carlo methods. Wilson et al. [46, 47] recently showed how to make use of *Matheron’s rule* [45, 66, 67] to efficiently sample from a GP posterior by sampling from the prior and then performing a pathwise update. We can directly make use of this strategy since Algorithm 1 computes a low-rank approximation to the precision matrix. Assume we are given a draw  $f'_{\text{prior}} \in \mathcal{H}_k^\theta$  from the prior<sup>3</sup> such that  $\mathbf{y}' \sim \mathcal{N}(f'_{\text{prior}}(\mathbf{X}), \sigma^2 \mathbf{I})$  constitutes a draw from the prior predictive. Then

$$f'(\cdot) = f'_{\text{prior}}(\cdot) + k(\cdot, \mathbf{X}) \mathbf{C}_i (\mathbf{y} - \mathbf{y}') \quad (\text{S54})$$

is a draw from the combined posterior by Matheron’s rule, which we can evaluate in  $\mathcal{O}(n_\diamond ni)$  for  $n_\diamond$  evaluation points, since  $\mathbf{C}_i$  has rank  $i$ .

## S4 Additional Experimental Results

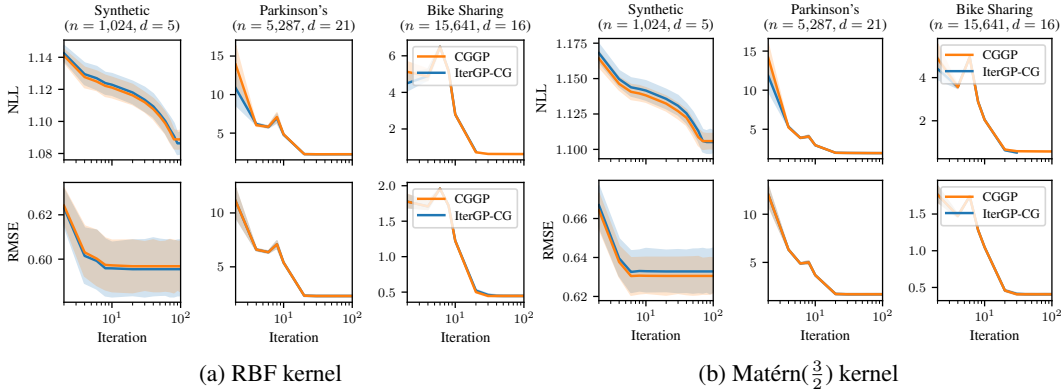

Figure S4: *Generalization of CGGP and its closest IterGP analog.* GP regression using an RBF and Matérn( $\frac{3}{2}$ ) kernel on UCI datasets. The plot shows the average generalization error in terms of NLL and RMSE for an increasing number of solver iterations. The posterior mean of IterGP-CG and CGGP is identical, which explains the identical RMSE.

<sup>3</sup>In infinite dimensional reproducing kernel Hilbert spaces samples  $f \sim \mathcal{GP}(\mu, k)$  from a Gaussian process almost surely do not lie in the RKHS  $\mathcal{H}_k$  [Cor. 4.10, 36]. However, there exists  $f' \in \mathcal{H}_k^\theta$  in a larger RKHS  $\mathcal{H}_k^\theta \supset \mathcal{H}_k$  such that  $f'(\mathbf{x}) = f(\mathbf{x})$  with probability 1 [Thm. 4.12, 36].

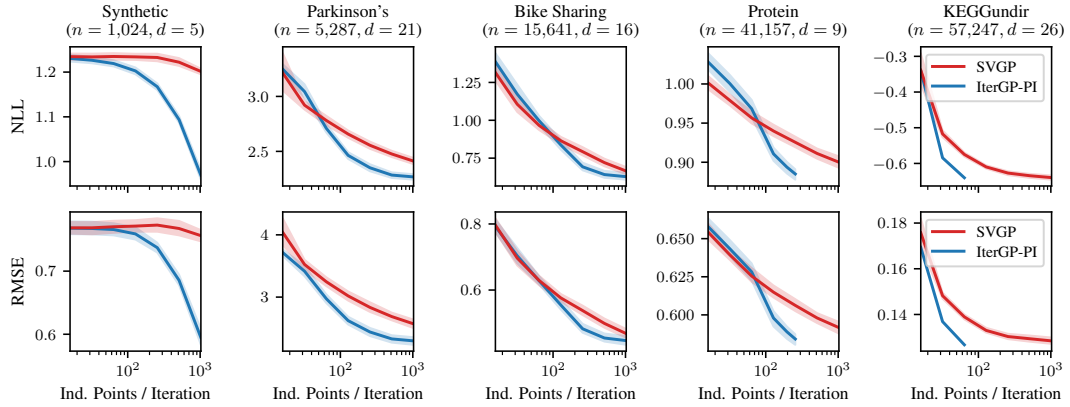

(a) RBF kernel

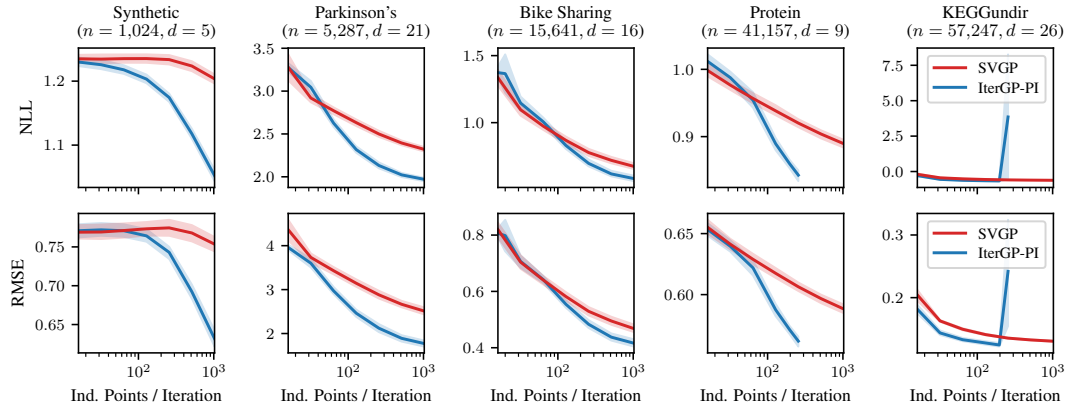

(b) Matérn( $\frac{3}{2}$ ) kernel

Figure S5: *Generalization of SVGP and its closest IterGP analog.* GP regression using an RBF and Matérn( $\frac{3}{2}$ ) kernel on UCI datasets. The plot shows the average generalization error in terms of NLL and RMSE for an increasing number of identical inducing points. After a small number of inducing points relative to the size of the training data, IterGP has significantly lower generalization error than SVGP. For the “KEGGundir” dataset after  $\approx 128$  iterations we observe numerical instability in some runs when computing the combined posterior of IterGP using a Matérn( $\frac{3}{2}$ ) kernel.
